# Supplementary material for: A copper tetrathiovanadate anode for ultra-stable potassium-ion storage
Source: Royal Society of Chemistry journal article supplement (doi:10.1039/d1qm01096d), 2021-11-12
Supplement: d1qm01096d1.pdf [file d1qm01096d1.pdf]

## Supporting Information

### **A copper tetrathiovanadate anode for ultra-stable potassium-ion storage**

Qifei Li,<sup>†a</sup> Xiangxiang Ye,<sup>†a</sup> Siling Cheng,<sup>a</sup> Hong Yu,<sup>b</sup> Weiling Liu,<sup>c</sup> Cheng-Feng Du,<sup>\*b</sup>  
and Xianhong Rui<sup>\*a</sup>

<sup>a</sup>*School of Materials and Energy, Guangdong University of Technology, Guangzhou 510006, China*

<sup>b</sup>*Center of Advanced Lubrication and Seal Materials, Northwestern Polytechnical University, 127 West Youyi Road, Xi'an 710072, PR China*

<sup>c</sup>*School of Materials Science and Engineering, Nanyang Technological University, Singapore, 639798, Singapore*

<sup>†</sup>*Q. Li and X. Ye contributed equally to this work.*

E-mail addresses: [cfdu@nwpu.edu.cn](mailto:cfdu@nwpu.edu.cn) (C. Du); [xhrui@gdut.edu.cn](mailto:xhrui@gdut.edu.cn) (X. Rui)

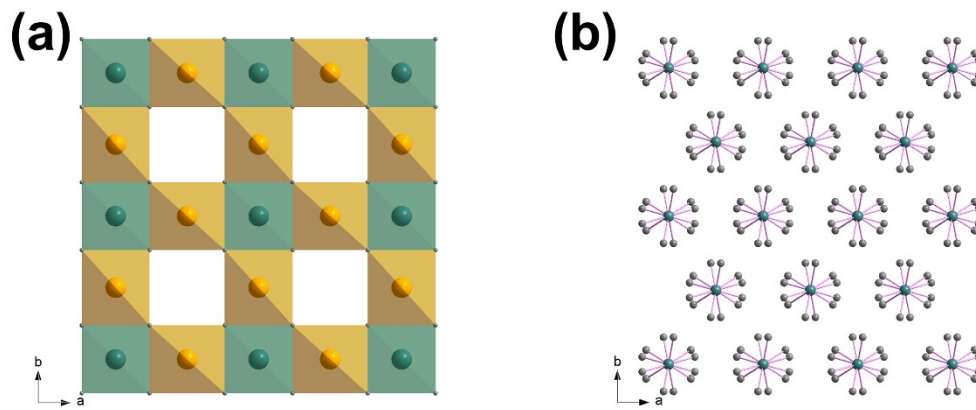

**Fig. S1** Schematic crystal structures of (a)  $\text{Cu}_3\text{VS}_4$  and (b)  $\text{VS}_4$ . Orange, green and gray toms present Cu, V and S, respectively.

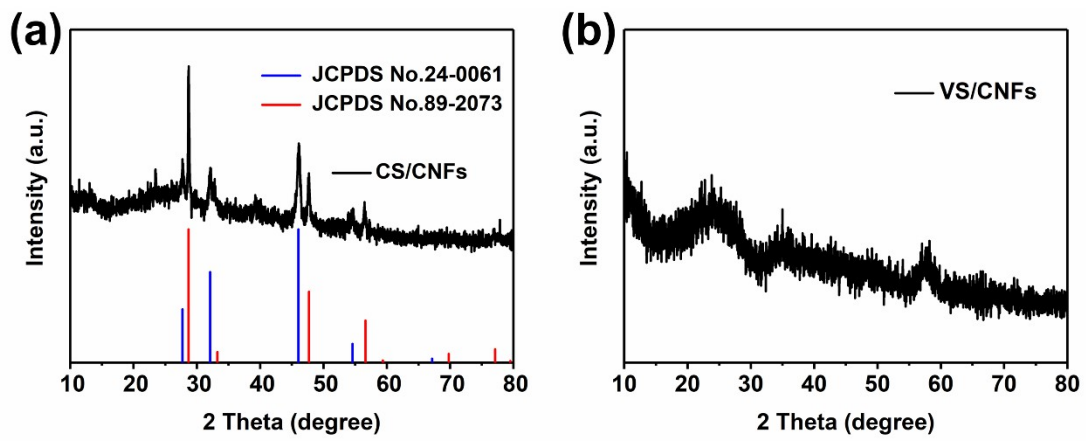

**Fig. S2** XRD patterns of (a) CS/CNFs and (b) VS/CNFs.

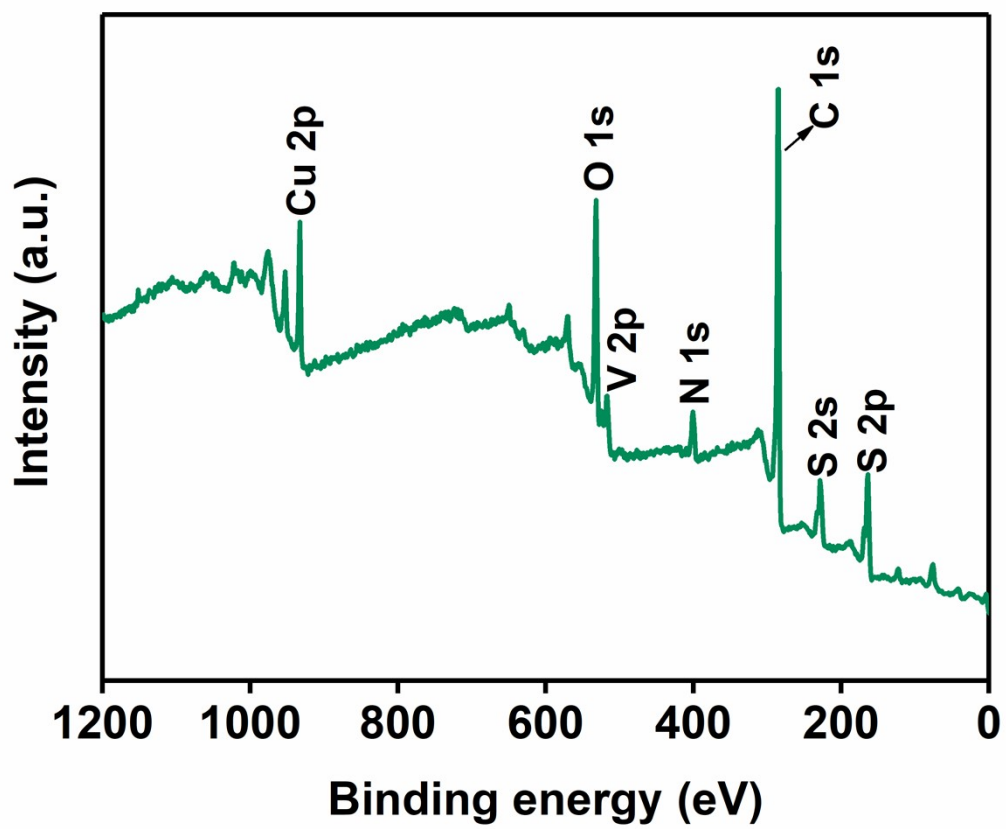

Fig. S3 Full XPS spectrum of CVS/CNFs.

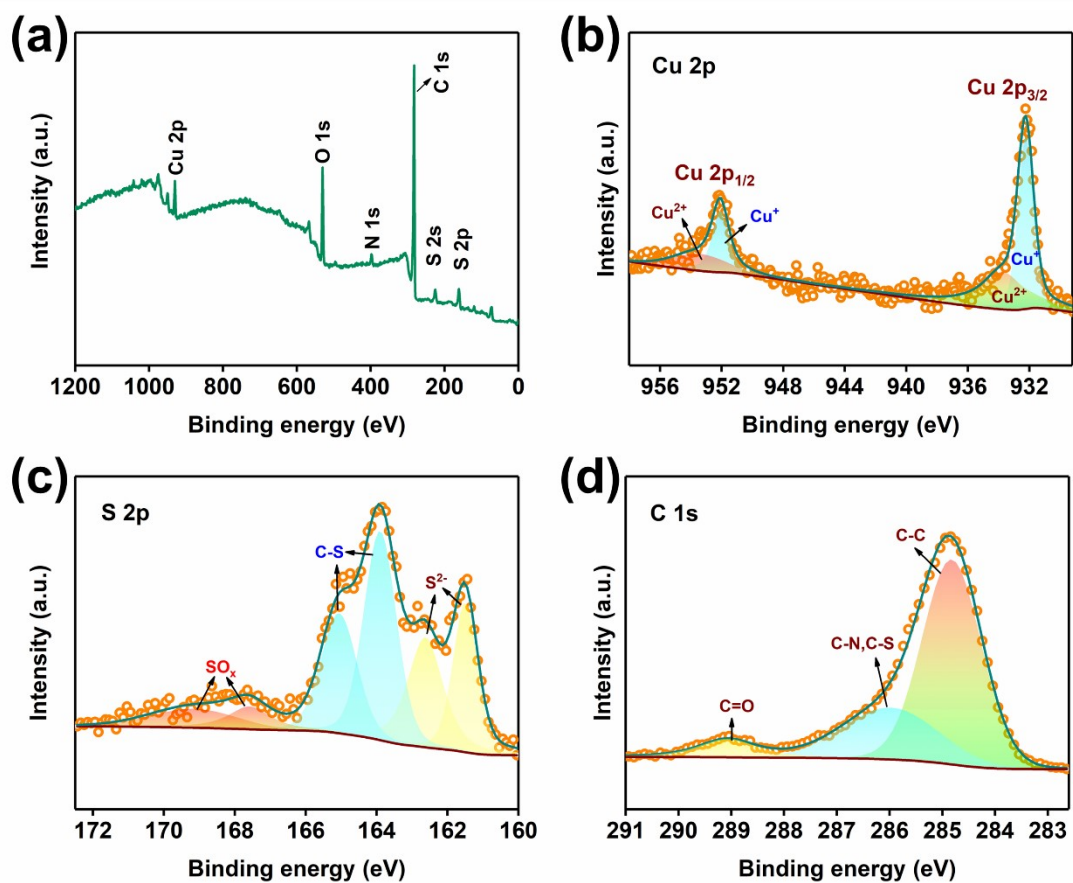

**Fig. S4** (a) XPS spectrum of CS/CNFs and (b-d) high resolution XPS spectra of Cu 2p, S 2p, C 1s, respectively.

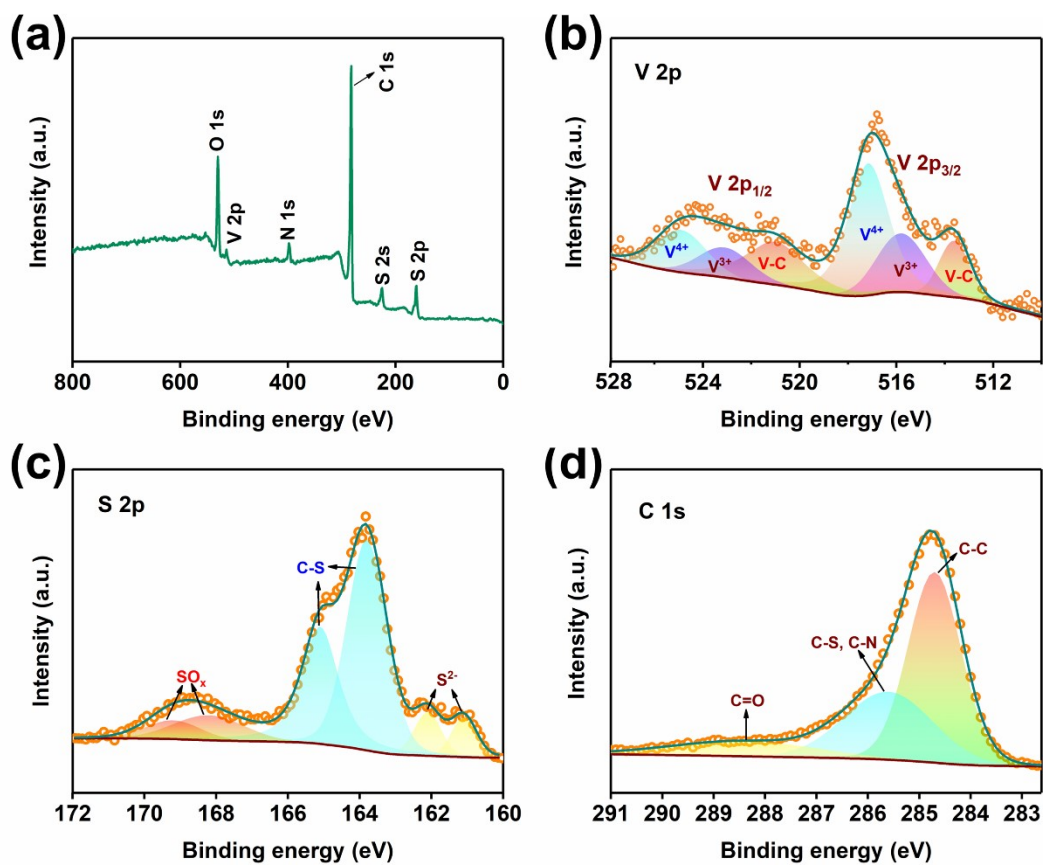

**Fig. S5** (a) XPS spectrum of VS/CNFs and (b-d) high resolution XPS spectra of V 2p, S 2p, C 1s, respectively.

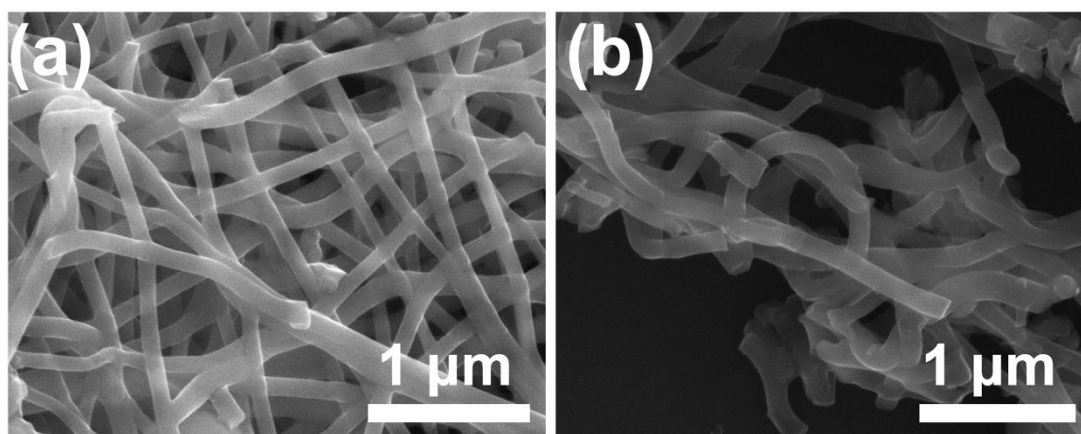

**Fig. S6** SEM images of (a) CS/CNFs and (b) VS/CNFs.

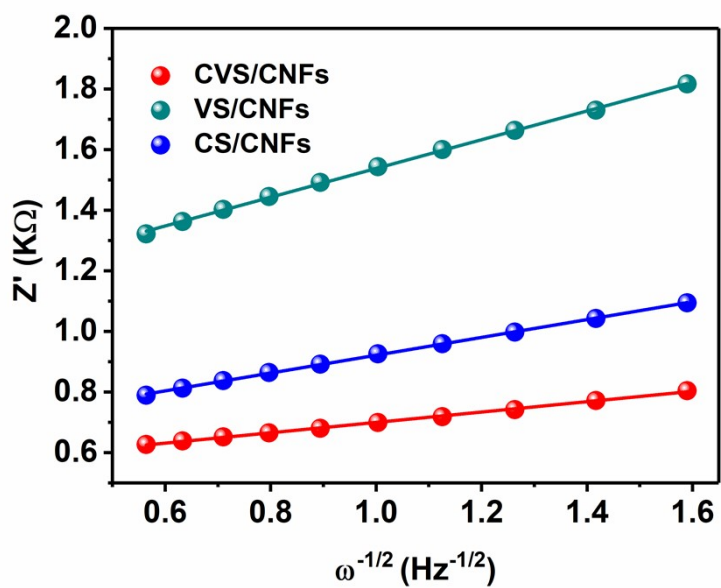

Fig. S7  $Z'-\omega^{-1/2}$  curve in low-frequency region and linear fitting.

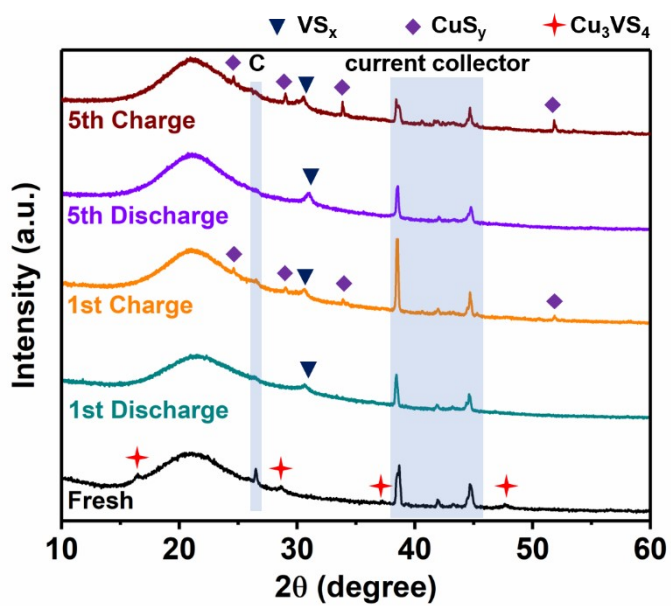

Fig. S8 *Ex-situ* XRD patterns of CVS/CNFs electrode under different state.

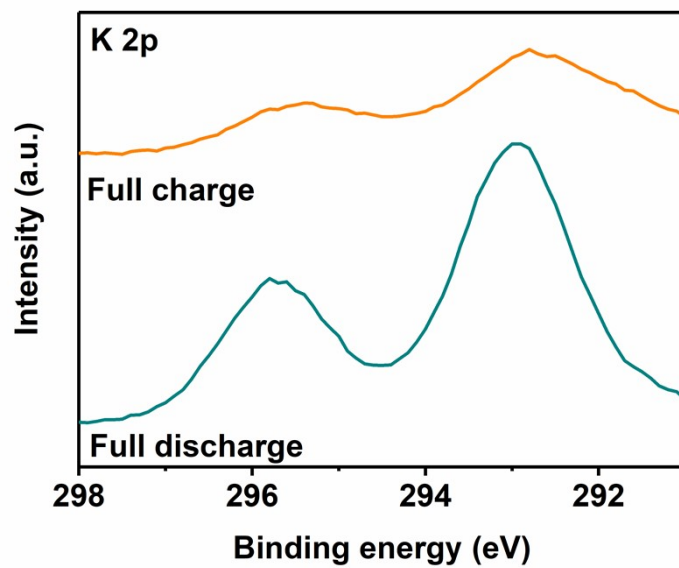

**Fig. S9** High resolution XPS spectra of K 2p at full discharge/charge state.

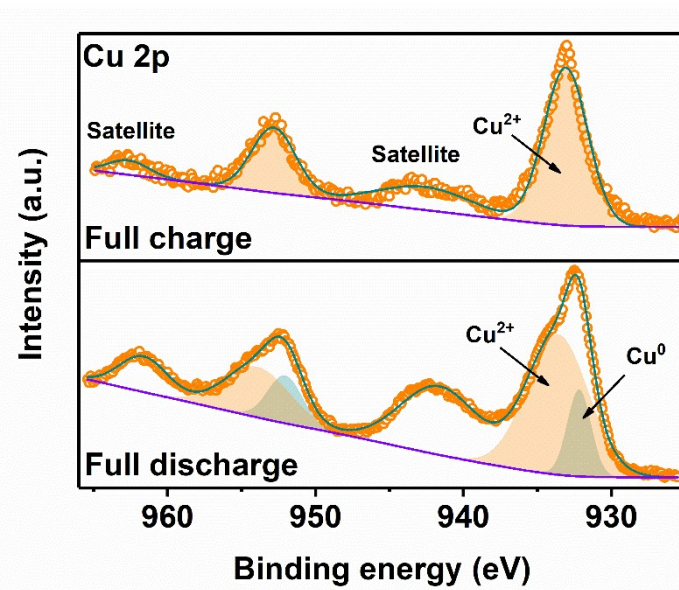

**Fig. S10** High resolution XPS spectra of Cu 2p at full discharge/charge state.

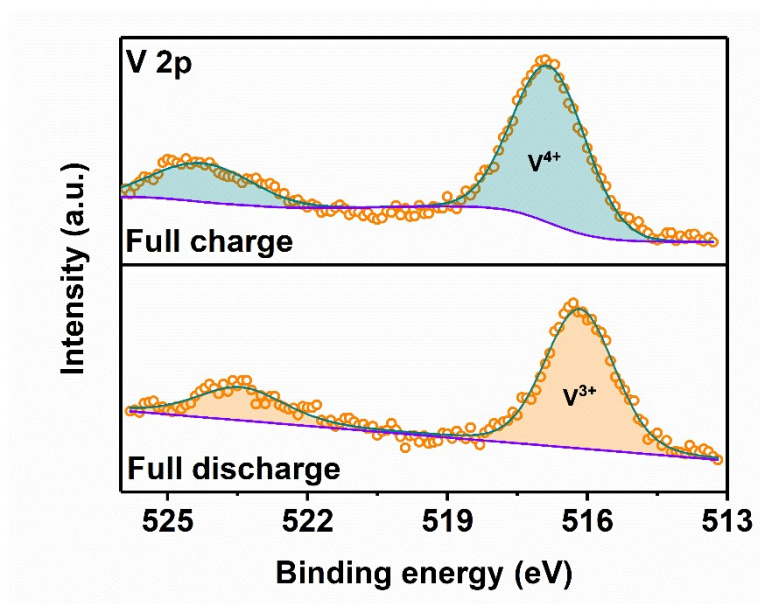

**Fig. S11** High resolution XPS spectra of V 2p at full discharge/charge state.
